# Supplementary material for: Nutritional deuterium depletion and health: a scoping review
Source: PubMed Central journal article supplement — Metabolomics. 2024 Oct 13;20(6):117. doi: 10.1007/s11306-024-02173-4 (PMC11471703; doi:10.1007/s11306-024-02173-4), 2024-10-13
Supplement: 11306_2024_2173_MOESM2_ESM.pdf [file 11306_2024_2173_MOESM2_ESM.pdf]

Appendices

Table 1

| Study                | Sample Population                                                                                     | Study Design                                              | Exposure                                                                                                       | Outcome 1*                                                                                                                                           | Outcome 2, etc.*                                                                                                                                                                                                                                                                                        | Comments                                                                                                                                                              |
|----------------------|-------------------------------------------------------------------------------------------------------|-----------------------------------------------------------|----------------------------------------------------------------------------------------------------------------|------------------------------------------------------------------------------------------------------------------------------------------------------|---------------------------------------------------------------------------------------------------------------------------------------------------------------------------------------------------------------------------------------------------------------------------------------------------------|-----------------------------------------------------------------------------------------------------------------------------------------------------------------------|
| Kovács, et al., 2022 | - media                                                                                               |                                                           | low deuterium (40 and 80 ppm) and high deuterium (300 ppm) media compared to natural deuterium level (150 ppm) | expression of 236 cancer-related and 536 kinase genes                                                                                                | 97.3% of them were upregulated at 300 ppm                                                                                                                                                                                                                                                               | showed that blocking the increase of intracellular deuterium concentration prevents the express of cancer-related genes                                               |
|                      | - mice exposed to chemical carcinogen                                                                 |                                                           |                                                                                                                | deuterium-depleted drinking water (30 ppm)                                                                                                           |                                                                                                                                                                                                                                                                                                         | prevented tumor development                                                                                                                                           |
|                      | - human<br>- 204 cancer patients that had been treated previously with disease currently in remission | - retrospective study                                     | consumption of DDW                                                                                             | - 77.9% did not relapse during 803 years collective follow-up time<br><br>- 8 out of 11 deaths occurred several years after stopping DDW consumption | - The proposed mechanism is preventing the D/H ratios (through drinking deuterium-depleted water) to reach the threshold necessary for cell division; suggesting that this could be a solution to reducing the relapse rate of cancer patients and/or decreasing the cancer incidence in healthy people | - regularly drinking DDW could prevent cancer recurrence<br><br>- could decrease the relapse rate of cancer patients and/or reduce cancer incidence in healthy people |
| Kovács, et al., 2011 | - human<br>- prostate cancer                                                                          | double-blind, randomized, 4-month long, phase II, placebo | replacement of daily water intake with DDW (85 ppm) versus                                                     | - 1 patient in the placebo group achieved partial                                                                                                    | - net decrease in prostate size treated versus control                                                                                                                                                                                                                                                  | showed deuterium depletion may delay the progression of prostate cancer                                                                                               |

|                        |                                                                   |                                      |                                                                        |                                                                                                                                                         |                                                                                                                                            |                                                                                                                                                                                 |
|------------------------|-------------------------------------------------------------------|--------------------------------------|------------------------------------------------------------------------|---------------------------------------------------------------------------------------------------------------------------------------------------------|--------------------------------------------------------------------------------------------------------------------------------------------|---------------------------------------------------------------------------------------------------------------------------------------------------------------------------------|
|                        |                                                                   | controlled, clinical trial           | normal water (150 ppm)                                                 | response (p = 0.046)<br>- 11 patients no change<br><br>-13 patients in placebo group had non-significant difference                                     | group (p = 0.0019)                                                                                                                         |                                                                                                                                                                                 |
| Krempels, et al., 2008 | - human<br><br>- 4 lung cancer patients who have brain metastasis | case-based, retrospective evaluation | DDW consumption                                                        | - prolonged survival time                                                                                                                               | - 2 patients showed complete response<br><br>- 1 patient detected partial response<br><br>- 1 case the tumor growth was halted (no change) | showed deuterium depletion in addition to conventional treatments, improves mean survival in lung cancer                                                                        |
| Somlyai, et al., 2023  | - human<br><br>- glioblastoma multiforme patients                 | preliminary study                    | daily fluid intake was replaced with DDW of 1.5-2 L per day            | - improvement in the median survival time<br><br>- survival times were prolonged compared to the prospective clinical data                              |                                                                                                                                            | showed deuterium depletion in combination with conventional therapy, improved median survival time                                                                              |
| Krempels, et al., 2013 | - human<br><br>- 232 breast cancer patients<br><br>- 91 days      | retrospective study                  | normal daily water intake (150 ppm) was replaced with DDW (65-105 ppm) | - patients with early stage breast cancer (n=158) had a median survival time of 217 months<br><br>- patients with advanced disease (n=74) had 52 months |                                                                                                                                            | showed deuterium depleted water in combination with or as an extension of conventional therapies, prolonged median survival time in certain subgroups of breast cancer patients |

|                          |                                                                                                     |                                                       |                                             |                                                                                                                       |                                                             |                                                                                                                                                                         |
|--------------------------|-----------------------------------------------------------------------------------------------------|-------------------------------------------------------|---------------------------------------------|-----------------------------------------------------------------------------------------------------------------------|-------------------------------------------------------------|-------------------------------------------------------------------------------------------------------------------------------------------------------------------------|
|                          |                                                                                                     |                                                       |                                             | - MST of 24.4 years in the subgroup of 53 patients who received DDW at least twice                                    |                                                             |                                                                                                                                                                         |
| Somlyai, et al., 2022    | - in vivo mouse models<br><br>- one model 4T1 cell line with high metastatic capacity to lung       |                                                       | - deuterium depleted food additive (DDyolk) | - after 3 weeks of treatment with DDW and/or DDyolk, in all treated groups, the tumor volume in the lungs was smaller |                                                             | showed deuterium depleted water and/or deuterium depleted yolk led to smaller tumor volume                                                                              |
|                          | - in vivo mouse models<br><br>- mice transplanted with MCF-7 breast cancer cell line                |                                                       |                                             | - tumor growth                                                                                                        | - survival                                                  | showed the anticancer effect of deuterium depleted water was enhanced by food containing deuterium-depletion                                                            |
| Cong, et al., 2009       | - human lung carcinoma cell line A549<br><br>- and human embryonic lung fibroblasts HLF-1           |                                                       | DDW                                         | - cellular growth inhibition rates<br><br>- inhibited the proliferation of A549 cells at a specific time point        | - cells demonstrated the morphological changes of apoptosis | shown to inhibit lung tumor growth in vivo as well as inhibited the proliferation of A549 cell lines with an accompanying increase in apoptosis                         |
|                          | - tumor transplantation model by injecting H460 tumor cells into subcutaneous tissue of BALB/c mice |                                                       | DDW for 60 days                             | - tumor inhibition rate was 30%                                                                                       | - tumor weight significantly decreased                      |                                                                                                                                                                         |
| Strekalova, et al., 2014 | - human<br>- depression                                                                             | - epidemiological study<br><br>- correlation analysis | deuterium content of tap water              | significant correlation (p=0.0016) between deuterium content of tap water                                             |                                                             | showed a significant positive correlation between geographical distribution of the deuterium content of natural tap water in the US population and rates of depression. |

|                      |                                                                           |                                                                     |                                                                            |                                                                                                                           |  |                                                                                                                                                                                                                                                                |
|----------------------|---------------------------------------------------------------------------|---------------------------------------------------------------------|----------------------------------------------------------------------------|---------------------------------------------------------------------------------------------------------------------------|--|----------------------------------------------------------------------------------------------------------------------------------------------------------------------------------------------------------------------------------------------------------------|
|                      |                                                                           |                                                                     |                                                                            | and rates of depression                                                                                                   |  |                                                                                                                                                                                                                                                                |
| Molnár, et al., 2021 | - streptozotocin (STZ) – induced diabetic rat model<br><br>- diabetes     |                                                                     | subnormal D <sub>2</sub> O<br>concentration<br>(in a range of 25-150 ppm)  | glucose metabolism<br><br>- reduced serum levels of glucose, - fructose, - amines, and - HbA1c in a dose dependent manner |  | confirmed that deuterium depletion, in a dose-dependent manner, enhanced the effect of insulin on Glucose Transporter type 4 (GLUT4) translocation.                                                                                                            |
| Somlyai et al., 2020 | - human<br><br>- 30 volunteers<br><br>- pre- or manifest diabetes         | - clinical prospective study/<br>preliminary study<br><br>- 90 days | 1.5 L of water with reduced deuterium content (104 ppm instead of 145 ppm) | - fasted insulin and glucose decreased                                                                                    |  | with pre- or manifest diabetes, DDW (104 ppm) significantly reduced the fasting glucose level and decreased insulin resistance                                                                                                                                 |
| Mladin et al., 2014  | - normal Wistar rats<br><br>- long term memory                            |                                                                     | chronic administration of DDW versus distilled water                       | - spatial working memory and locomotor activity or both short-term and long-term spatial memory                           |  | DDW significantly decreased the number of reference memory errors, speculating that DDW may stimulate long-term memory                                                                                                                                         |
| Ávila et al., 2012   | - <i>Caenorhabditis elegans</i> ( <i>C. elegans</i> )<br><br>- anti-aging |                                                                     | DDW (90 ppm)                                                               | - restored life-span                                                                                                      |  | DDW (90 ppm) reversed manganese (Mn)-induced lifespan decrease, restoring lifespan                                                                                                                                                                             |
| Boros et al., 2024   | - human<br><br>- sports performance                                       | - medical hypothesis<br><br>- case report / sample cohort           | nutritional ketosis                                                        | - successful summiting of Mount Everest without supplemental oxygen                                                       |  | after six failed attempts by the same high altitude professional mountain climber using carbohydrate-based nutrition (glycogenic), the athlete in deuterium depleting nutritional ketosis was finally able to summit Mount Everest without supplemental oxygen |

|                             |                                                                                        |                       |                                                                                                                     |                                                  |  |                                                                                                                                                                                                                                                                                                                                                                                                                                                                                                                                                                                                                                                               |
|-----------------------------|----------------------------------------------------------------------------------------|-----------------------|---------------------------------------------------------------------------------------------------------------------|--------------------------------------------------|--|---------------------------------------------------------------------------------------------------------------------------------------------------------------------------------------------------------------------------------------------------------------------------------------------------------------------------------------------------------------------------------------------------------------------------------------------------------------------------------------------------------------------------------------------------------------------------------------------------------------------------------------------------------------|
| <p>Gyöngyi et al., 2013</p> | <p>- human<br/>- 129 patients<br/><br/>- small cell and nonsmall cell lung cancers</p> | <p>clinical study</p> | <p>DDW</p>                                                                                                          | <p>- median survival time</p>                    |  | <p>deuterium-depleted drinking water in addition to conventional chemotherapy and radiotherapy, median survival time was 25.9 months in males and 74.1 month in female patients; this was statically significant (<math>p &lt; 0.05</math>).<sup>25</sup> For women with tumors overexpressing cancer-related genes, those who drank deuterium-depleted water had a median survival time that was 2 – 4 times longer than what is typically seen in lung cancer patients.</p>                                                                                                                                                                                 |
|                             | <p>- mouse lung</p>                                                                    |                       | <p>DDW</p>                                                                                                          | <p>- expression of Kras, Bcl2, and Myc genes</p> |  | <p>DDW attenuates 7,12-dimethylbenz(a)anthracene (DMBA) induced expression of Bcl2, Kras, and Myc in females</p>                                                                                                                                                                                                                                                                                                                                                                                                                                                                                                                                              |
| <p>Boros, et al, 2020</p>   | <p>- human<br/>- pancreatic adenocarcinoma patients</p>                                |                       | <p>Conventional chemotherapy + DDW (85ppm), decreased to 65ppm and 45 ppm for each 1 -3 months treatment period</p> | <p>- median survival time (MST)</p>              |  | <p>“Eighty-six (36 male and 50 female) pancreatic adenocarcinoma patients were treated with conventional chemotherapy and natural water (control, 30 patients) or 85 ppm DDW (56 patients), which was gradually decreased to preparations with 65 ppm and 45 ppm deuterium content for each 1 to 3 months treatment period. The mean survival time for patients consuming DDW treatment (n = 56) was 19.6 months in comparison with the 6.36 months’ MS achieved with chemotherapy alone (n = 30). There was a strong, statistically significant Pearson correlation (<math>r = 0.504</math>, <math>p &lt; 0.001</math>) between survival time and length</p> |

|  |  |  |  |  |  |                                                |
|--|--|--|--|--|--|------------------------------------------------|
|  |  |  |  |  |  | and frequency of DDW treatment.” <sup>27</sup> |
|--|--|--|--|--|--|------------------------------------------------|
